# Supplementary material for: Morphological changes of gold nanoparticles due to adsorption onto silicon substrate and oxygen plasma treatment
Source: Royal Society of Chemistry journal article supplement (doi:10.1039/c4ra00507d), 2014-01-01
Supplement: c4ra00507d1.pdf [file c4ra00507d1.pdf]

ELECTRONIC SUPPLEMENTARY INFORMATION

**Morphological Changes of Gold Nanoparticles Due to Adsorption onto Silicon Substrate  
and Oxygen Plasma Treatment**

*Katarzyna Winkler, Tomasz Wojciechowski, Malwina Liszewska, Ewa Górecka, Marcin  
Fiałkowski\**

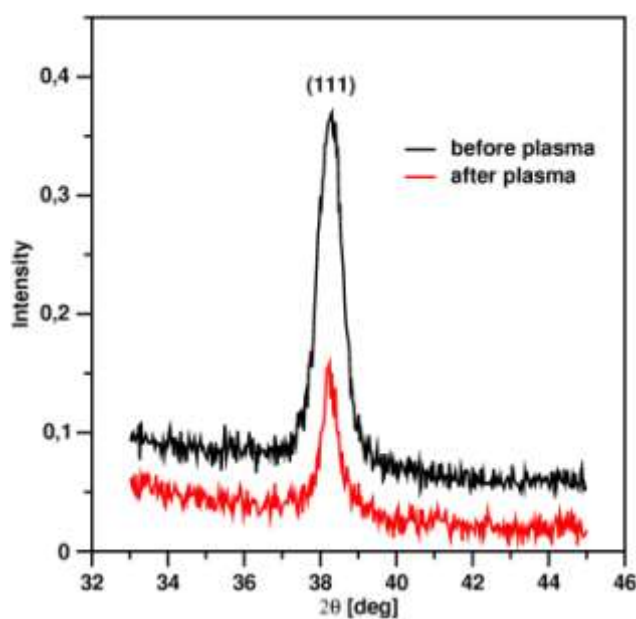

**Fig. ESI-1** XRD spectra of the AuNPs recorded before and after the plasma treatment. Both patterns display Au(111) reflection peaks.

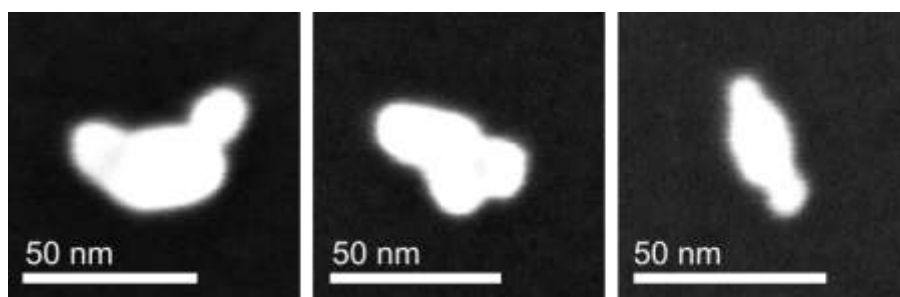

**Fig. ESI-2** SEM images of the partially fused AuNPs present on the low-coated surface.
